# Supplementary material for: Fabrication and Characterization of Electrospun Folic Acid/Hybrid Fibers: In Vitro Controlled Release Study and Cytocompatibility Assays
Source: MDPI journal article supplement (doi:10.3390/polym13203594), 2021-10-19
Supplement: s1 [file s1]

# Fabrication and Characterization of Electrospun Folic Acid/Hybrid Fibers: In Vitro Controlled Release Study and Cytocompatibility Assays

Fatma Nur Parin<sup>1\*</sup>, Sana Ullah<sup>2</sup>, Kenan Yıldırım<sup>1</sup>, Motahira Hashmi<sup>2</sup>, Ick Soo Kim<sup>2\*</sup>

<sup>1</sup>Faculty of Engineering and Nature Science, Department of Polymer Materials Engineering, Bursa Technical University, Mimar Sinan Campus, Turkey

<sup>2</sup>Graduate School of Medicine Science and Technology, Department of Science and Technology, Division of Smart Material, Shinshu University Ueda Campus, Japan

\* Correspondence:  
Dr. Fatma Nur Parin  
[nur.parin@btu.edu.tr](mailto:nur.parin@btu.edu.tr)

Prof. Dr. Ick Soo Kim  
[Kim@shinshu-u.ac.jp](mailto:Kim@shinshu-u.ac.jp)

**Table S1.** Regression values of the FA-loaded and FA-sprayed nanofibers.

| Sample ID                | Kinetic models |             |                |         |                  | "n" value |
|--------------------------|----------------|-------------|----------------|---------|------------------|-----------|
|                          | Zero-order     | First-order | Hixson-Crowell | Higuchi | Korsmeyer-Peppas |           |
| PVA-Gel/FA (pH 5.44)     | 0.71           | 0.88        | 0.84           | 0.84    | 0.97             | 0.61      |
| PVA-Gel/FA (pH 8.04)     | 0.81           | 0.88        | 0.86           | 0.93    | 0.87             | 0.32      |
| PVA-Gel/sFA (pH 5.44)    | 0.94           | 0.93        | 0.93           | 0.82    | 0.95             | 0.22      |
| PVA-Gel/sFA (pH 8.04)    | 0.44           | 0.71        | 0.61           | 0.63    | 0.96             | 0.37      |
| PVA-Chi/FA (pH 5.44)     | 0.77           | 0.86        | 0.83           | 0.9     | 0.94             | 0.43      |
| PVA-Chi/FA (pH 8.04)     | 0.7            | 0.94        | 0.88           | 0.84    | 0.98             | 0.51      |
| PVA-Chi/sFA FA (pH 5.44) | 0.46           | 0.64        | 0.99           | 0.66    | 0.99             | 0.86      |

|                           |      |      |      |      |      |      |
|---------------------------|------|------|------|------|------|------|
| PVA-Chi/sFA FA (pH 8.04)  | 0.43 | 0.55 | 0.5  | 0.63 | 0.99 | 0.87 |
| PVA-Alg/FA (pH 5.44)      | 0.65 | 0.7  | 0.69 | 0.83 | 0.95 | 0.15 |
| PVA-Alg/FA (pH 8.04)      | 0.57 | 0.6  | 0.59 | 0.76 | 0.9  | 0.18 |
| PVA-Alg/sFA (pH 5.44)     | 0.87 | 0.91 | 0.9  | 0.94 | 0.78 | 0.46 |
| PVA-Alg/sFA (pH 8.04)     | 0.74 | 0.92 | 0.79 | 0.87 | 0.96 | 0.31 |
| PVA-Gel-Chi/FA (pH 5.44)  | 0.77 | 0.92 | 0.87 | 0.92 | 0.98 | 0.55 |
| PVA-Gel-Chi/FA (pH 8.04)  | 0.82 | 0.95 | 0.93 | 0.94 | 0.89 | 0.31 |
| PVA-Gel-Chi/sFA (pH 5.44) | 0.95 | 0.99 | 0.98 | 0.96 | 0.99 | 0.35 |
| PVA-Gel-Chi/sFA (pH 8.04) | 0.67 | 0.73 | 0.71 | 0.86 | 0.94 | 0.35 |
| PVA-Alg-Chi/FA (pH 5.44)  | 0.77 | 0.91 | 0.86 | 0.92 | 0.96 | 0.52 |
| PVA-Alg-Chi/FA (pH 8.04)  | 0.76 | 0.95 | 0.9  | 0.89 | 0.94 | 0.34 |
| PVA-Alg-Chi/sFA (pH 5.44) | 0.98 | 0.98 | 0.98 | 0.96 | 0.93 | 0.35 |
| PVA-Alg-Chi/sFA (pH 8.04) | 0.74 | 0.93 | 0.88 | 0.88 | 0.94 | 0.34 |

**Table S2.** The entrapment efficiency (%) and loading capacities (%) of all nanofibers.

| Sample ID   | Entrapment efficiency (%) | Loading capacity (%) |
|-------------|---------------------------|----------------------|
| PVA-Gel/FA  | 89.03 ±4.4                | 1.53 ±0.08           |
| PVA-Gel/sFA | 94.82 ± 4.7               | 1.53 ±0.08           |
| PVA-Chi/FA  | 93.11 ± 4.6               | 2.34 ±0.12           |
| PVA-Chi/sFA | 93.35 ± 4.6               | 2.34 ±0.12           |

|                 |             |            |
|-----------------|-------------|------------|
| PVA-Alg/FA      | 50.66 ± 2.5 | 1.12 ±0.05 |
| PVA-Alg/sFA     | 94.36 ±4.72 | 1.12 ±0.05 |
| PVA-Gel-Chi/FA  | 91.06 ±4.55 | 2.53 ±0.13 |
| PVA-Gel-Chi/sFA | 77.56 ±3.87 | 2.53 ±0.13 |
| PVA-Alg-Chi/FA  | 89.62 ±4.48 | 2.82 ±0.14 |
| PVA-Alg-Chi/sFA | 66.38±3.32  | 2.82 ±0.14 |
